# Supplementary material for: Virome of a Feline Outbreak of Diarrhea and Vomiting Includes Bocaviruses and a Novel Chapparvovirus
Source: PubMed Central journal article supplement (PMC7291048; doi:10.3390/v12050506), 2020-05-04
Supplement: viruses-12-00506-s001.pdf [file viruses-12-00506-s001.pdf]

**Table S1.** Clinical signs and case definition ratings for all cats meeting case definition.

| <b>Animal ID</b> | <b>Clinical signs onset</b> | <b>Lethargy</b> | <b>Vomiting</b> | <b>Diarrhea</b> | <b>Inappetence</b> | <b>Full resolution of clinical signs</b> | <b>Illness duration in days</b> |
|------------------|-----------------------------|-----------------|-----------------|-----------------|--------------------|------------------------------------------|---------------------------------|
| 182              | 11/9/18                     |                 | 11/9/18         | 11/9/18         |                    | 11/23/18                                 | 14                              |
| 181              | 11/12/18                    |                 | 11/12/18        | 11/12/18        |                    | 11/21/18                                 | 9                               |
| 183              | 11/12/18                    |                 | 11/12/18        | 11/12/18        |                    | 11/21/18                                 | 9                               |
| 853              | 11/15/18                    |                 | 11/15/18        |                 |                    | 11/19/18                                 | 4                               |
| 616              | 11/16/18                    |                 | 11/16/18        |                 | 12/4/18            | 11/19/18                                 | 3                               |
| 614              | 11/16/18                    |                 | 11/16/18        | 11/16/18        | 11/16/18           | 11/21/18                                 | 5                               |
| 688              | 11/17/18                    |                 |                 | 11/17/18        |                    | 11/27/18                                 | 10                              |
| 256              | 11/19/18                    |                 |                 | 11/19/18        |                    | 11/21/18                                 | 2                               |
| 255              | 11/19/18                    |                 |                 | 11/19/18        |                    | 11/21/18                                 | 2                               |
| 160              | 11/20/18                    |                 | 11/23/18        | 11/22/18        |                    | 11/27/18                                 | 7                               |
| 936              | 11/21/18                    |                 | 11/23/18        | 11/21/18        | 11/23/18           | 12/10/18                                 | 19                              |
| 643              | 11/23/18                    | 11/25/18        | 11/23/18        | 11/24/18        | 11/25/18           | Euth<br>11/27/18                         | N/A                             |
| 973              | 11/23/18                    |                 | 11/23/18        | 11/25/18        |                    | 11/30/18                                 | 7                               |
| 974              | 11/23/18                    |                 | 11/23/18        | 11/25/18        |                    | 11/30/18                                 | 7                               |
| 975              | 11/23/18                    |                 | 11/23/18        | 11/25/18        |                    | 11/30/18                                 | 7                               |
| 080              | 11/23/18                    |                 |                 | 11/23/18        | 11/24/18           | 11/26/18                                 | 3                               |
| 056              | 11/23/18                    | 12/5/18         | 11/26/18        |                 | 11/23/18           | 11/29/18                                 | 6                               |
| 990              | 11/23/18                    |                 | 11/23/18        | 11/23/18        |                    | 11/28/18                                 | 5                               |
| 596              | 11/23/18                    |                 | 11/23/18        | 11/25/18        |                    | 11/25/18                                 | 2                               |
| 595              | 11/24/18                    |                 |                 | 11/25/18        |                    | 11/25/18                                 | 1                               |
| 928              | 11/27/18                    | 11/28/18        | 11/27/18        |                 | 11/28/18           | 12/1/18                                  | 4                               |
| 929              | 11/27/18                    |                 | 11/27/18        | 11/21/18        | 11/28/18           | 12/1/18                                  | 4                               |
| 842              | 11/27/18                    |                 | 11/27/18        |                 |                    | 11/30/18                                 | 3                               |
| 992              | 11/27/18                    |                 |                 | 11/27/18        |                    | 11/30/18                                 | 3                               |
| 694              | 11/28/18                    |                 | 11/28/18        | 11/30/18        |                    | 12/3/18                                  | 5                               |
| 465              | 11/30/18                    |                 | 12/2/18         | 11/30/18        |                    | 12/3/18                                  | 3                               |
| 257              | 11/30/18                    |                 | 12/2/18         | 11/30/18        |                    | 12/3/18                                  | 3                               |
| 989              | 12/1/18                     |                 |                 | 12/1/18         | 12/4/18            | 12/4/18                                  | 3                               |
| 723              | 12/5/18                     | 12/7/18         | 12/5/18         | 12/5/18         | 12/7/18            | 12/17/18                                 | 12                              |
| 752              | 12/6/18                     |                 | 12/6/18         | 12/9/18         |                    | Euth<br>12/11/18                         | N/A                             |
| 987              | 12/6/18                     |                 | 12/6/18         | 12/8/18         |                    | 12/11/18                                 | 5                               |
| 787              | 12/11/18                    |                 | 12/11/18        | 12/12/18        |                    | 12/12/18                                 | 1                               |
| 231              | 12/20/18                    |                 | 12/20/18        | 12/21/18        |                    | 12/24/18                                 | 4                               |
| 400              | 1/17/19                     |                 |                 | 1/17/19         |                    | 1/20/19                                  | 3                               |
| 912              | 1/18/19                     |                 |                 | 1/18/19         |                    | 1/29/19                                  | 11                              |

| <b>Animal ID</b> | <b>Clinical signs onset</b> | <b>Lethargy</b> | <b>Vomiting</b> | <b>Diarrhea</b> | <b>Inappetence</b> | <b>Full resolution of clinical signs</b> | <b>Illness duration in days</b> |
|------------------|-----------------------------|-----------------|-----------------|-----------------|--------------------|------------------------------------------|---------------------------------|
| 594              | 1/20/19                     | 1/20/19         |                 | 1/23/19         | 1/20/19            | 1/25/19                                  | 5                               |
| 283              | 1/21/19                     |                 |                 | 1/21/19         |                    | 1/29/19                                  | 8                               |
| 716              | 1/21/19                     |                 | 1/21/19         |                 |                    | 1/22/19                                  | 1                               |
| 806              | 1/22/19                     |                 |                 | 1/22/19         |                    | 1/28/19                                  | 6                               |
| 911              | 1/23/19                     |                 |                 | 1/23/19         |                    | 1/24/19                                  | 1                               |
| 849              | 1/24/19                     |                 | 1/24/19         |                 |                    | 1/25/19                                  | 1                               |
| 471              | 1/24/19                     |                 |                 | 1/24/19         |                    | 1/25/19                                  | 1                               |
| 178              | 1/28/19                     |                 | 1/28/19         |                 |                    | 1/29/19                                  | 1                               |

**Notes:** Orange shading: fechavirus positive  
Blue shading: bocavirus positive (3 different species)  
Gray shading: fechavirus and bocavirus positive

**Table S2: All fecal diagnostic test results for cats meeting case definition**

| <b>Animal ID</b> | <b>Fecal flotation (in-house)</b> | <b>Fecal flotation with helminth antigen</b> | <b>Multipathogen Diarrhea Panel</b>                  | <b>Rotavirus PCR</b> | <b>Parvo antigen test</b> | <b>Fechavirus PCR</b> |
|------------------|-----------------------------------|----------------------------------------------|------------------------------------------------------|----------------------|---------------------------|-----------------------|
| 182*             | NEG (11/13)                       |                                              |                                                      |                      |                           |                       |
| 181*             | NEG (11/13)                       |                                              |                                                      |                      |                           |                       |
| 183*             | NEG (11/13)                       |                                              |                                                      |                      |                           |                       |
| 853              |                                   |                                              |                                                      |                      | NEG (11/16)               |                       |
| 614              |                                   |                                              |                                                      |                      | NEG (11/16)               |                       |
| 688              |                                   | NEG (11/23)                                  | NEG (11/27)                                          | NEG (11/27)          |                           | POS (11/27)           |
| 160              |                                   | NEG (11/23)                                  | NEG (11/27)                                          | NEG (11/27)          |                           | POS (11/27)           |
| 936              |                                   | NEG (11/23)                                  | NEG (11/27)                                          | NEG (11/27)          |                           | NEG (11/27)           |
| 233              |                                   | NEG (11/16)                                  |                                                      |                      |                           |                       |
| 973*             |                                   |                                              | POS FPV (11/27)                                      | NEG (11/27)          |                           | NEG (11/27)           |
| 974*             |                                   |                                              | POS FPV (11/27)                                      | NEG (11/27)          |                           | NEG (11/27)           |
| 975*             |                                   |                                              | POS FPV (11/27)                                      | NEG (11/27)          |                           | NEG (11/27)           |
| 080              |                                   | POS (hookworm/roundworm) (11/24)             |                                                      |                      |                           |                       |
| 056              |                                   |                                              | NEG (11/27)                                          | NEG (11/27)          |                           | NEG (11/27)           |
| 990              |                                   |                                              | POS <i>C. Perfringens</i> (11/27)                    | NEG (11/28)          |                           | NEG (11/27)           |
| 723              |                                   | NEG (12/13)                                  |                                                      |                      | NEG (12/7)                | NEG (12/13)           |
| 787              |                                   |                                              | POS <i>Giardia</i> and <i>C. Perfringens</i> (12/12) |                      |                           | NEG (12/12)           |

| Animal ID | Fecal flotation (in-house) | Fecal flotation with helminth antigen | Multipathogen Diarrhea Panel                                                   | Rotavirus PCR | Parvo antigen test | Fechavirus PCR |
|-----------|----------------------------|---------------------------------------|--------------------------------------------------------------------------------|---------------|--------------------|----------------|
| 231       |                            | NEG (01/21)                           |                                                                                |               |                    | NEG (01/21)    |
| 400       |                            | NEG (01/22)                           |                                                                                |               |                    |                |
| 912       |                            | NEG (01/23)                           | POS <i>C. Perfringens</i> (1/20)                                               | NEG (01/20)   |                    | POS (01/20)    |
| 594       |                            |                                       | POS <i>C. Perfringens</i> (1/23)                                               | NEG (01/23)   |                    | POS (01/26)    |
| 283       |                            |                                       | POS <i>Giardia</i> , feline enteric coronavirus, <i>C. Perfringens</i> (01/25) | NEG (01/25)   |                    | POS (01/25)    |
| 806       |                            |                                       | POS <i>Giardia</i> and <i>C. Perfringens</i> (01/22)                           | NEG (01/22)   |                    | POS (01/22)    |
| 849       |                            |                                       |                                                                                |               |                    | POS (01/23)    |
| 471       |                            |                                       | NEG (01/24)                                                                    | NEG (01/24)   |                    | POS (01/24)    |
| 178       |                            |                                       |                                                                                |               |                    | NEG (01/28)    |
| 987       |                            |                                       |                                                                                |               |                    | NEG (12/6)     |

\*Note: Cats 181, 182, 183 and 973, 974, 975 pooled together (litters of kittens)

NEG = negative result, POS= positive result

Date in parentheses = sample collection date
